# Supplementary material
Source: Springer Nature journal article supplement (https://www.springermedizin.de/resource/supplementary/12936_2007_412_MOESM4_ESM.pdf/9547390)

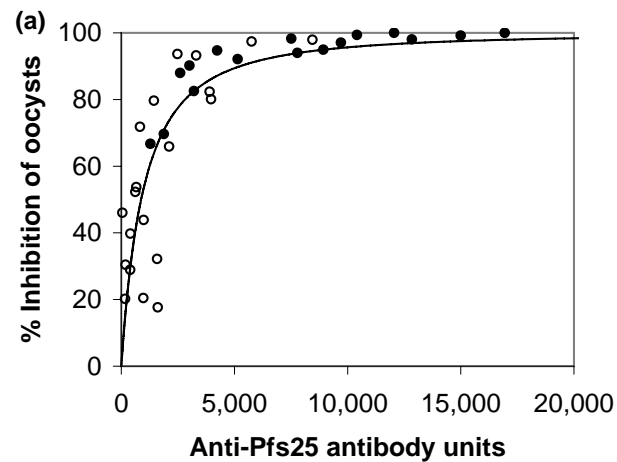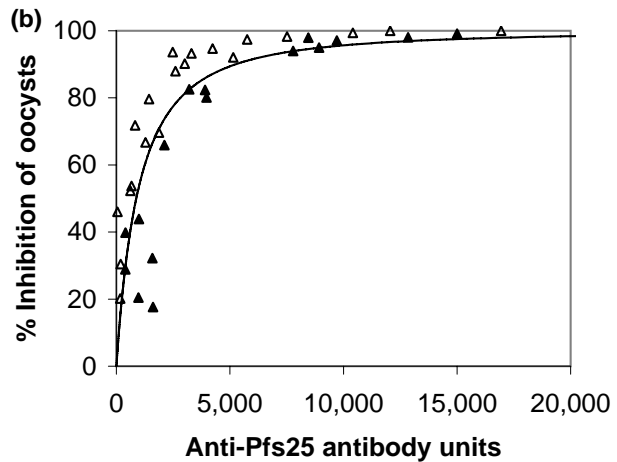

Supplement: MOESM4 [file 9547390]
